# Supplementary material for: Sliding window haplotype approaches overcome single SNP analysis limitations in identifying genes for meat tenderness in Nelore cattle
Source: PubMed Central journal article supplement (PMC6332854; doi:10.1186/s12863-019-0713-4), 2019-01-14

**Number of alleles: 2**

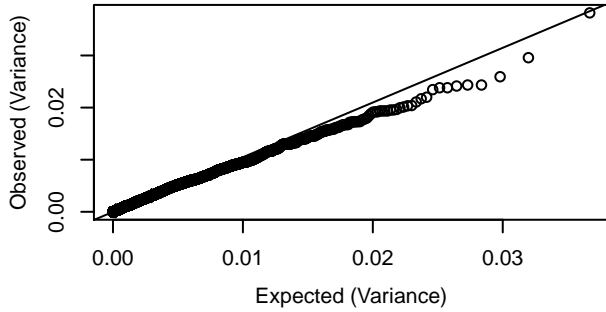

**Number of alleles: 3**

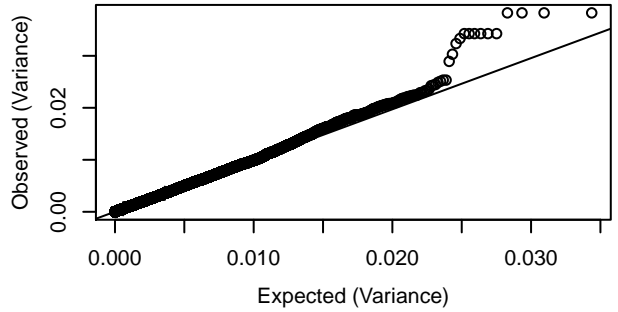

**Number of alleles: 4**

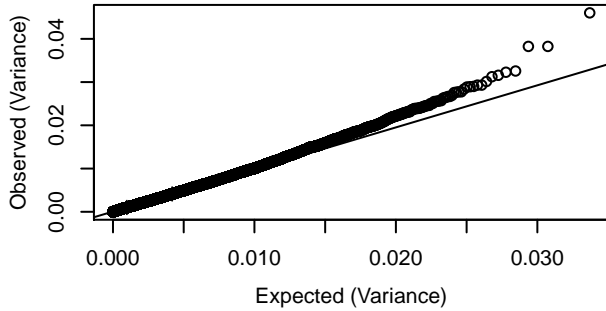

**Number of alleles: 5**

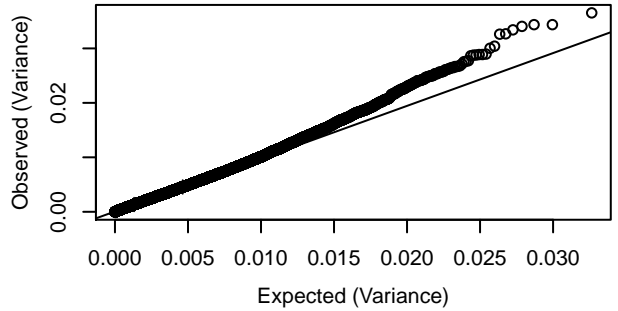

**Number of alleles: 6**

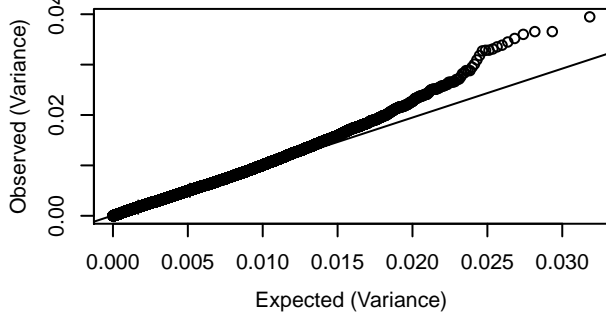

**Number of alleles: 7**

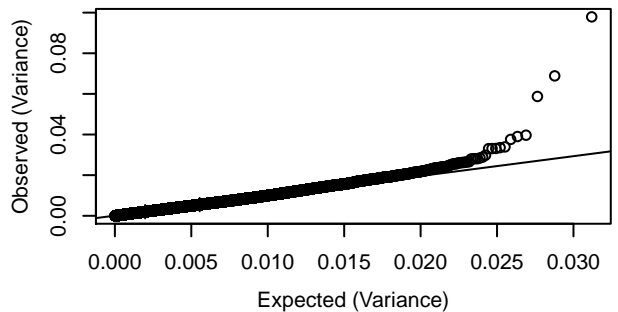

**Number of alleles: 8**

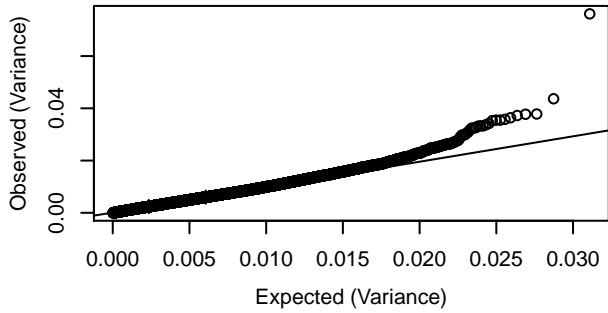

**Number of alleles: 9**

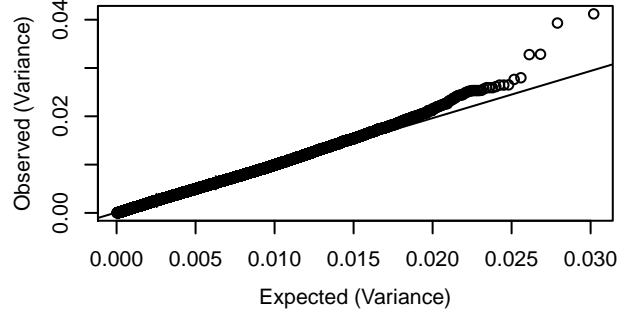

**Number of alleles: 10**

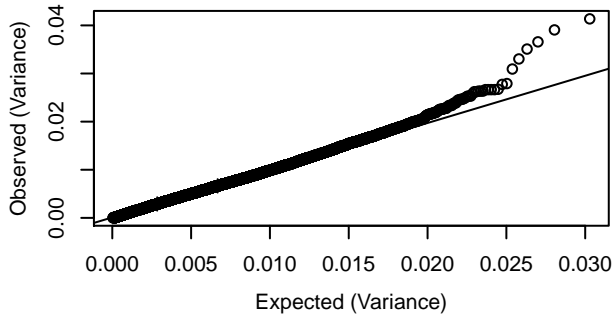

**Number of alleles: 11**

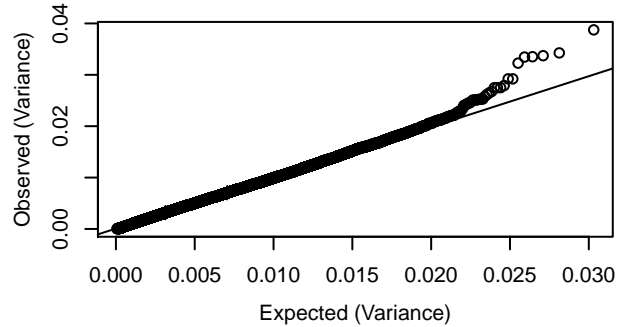

**Number of alleles: 12**

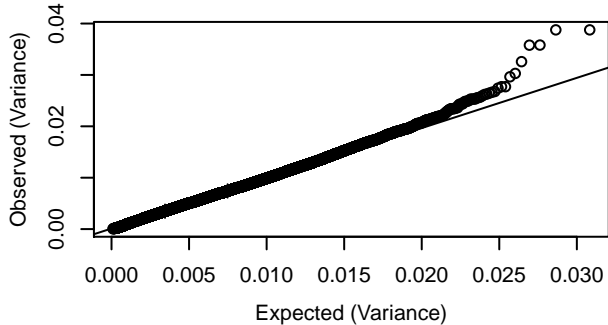

**Number of alleles: 13**

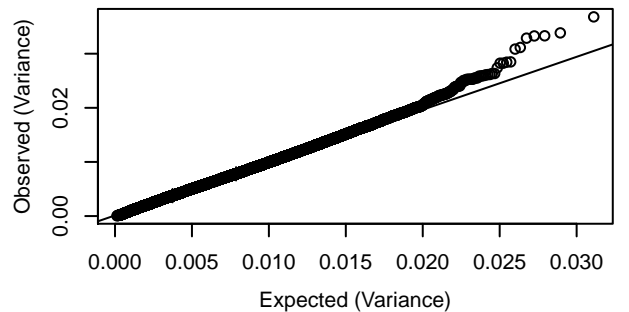

**Number of alleles: 14**

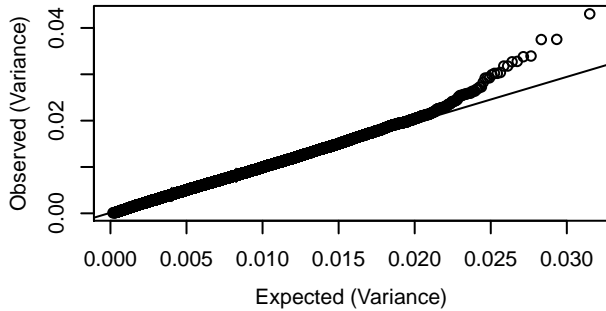

**Number of alleles: 15**

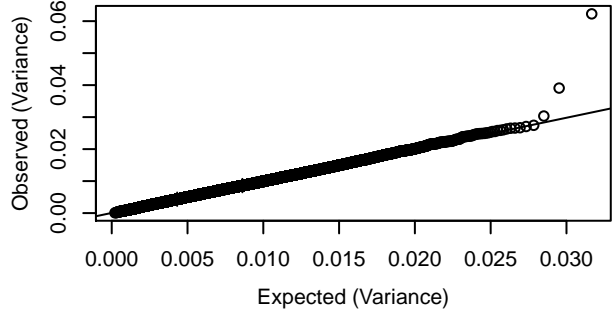

**Number of alleles: 16**

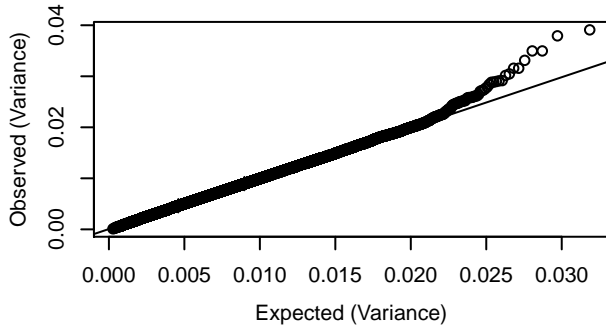

**Number of alleles: 17**

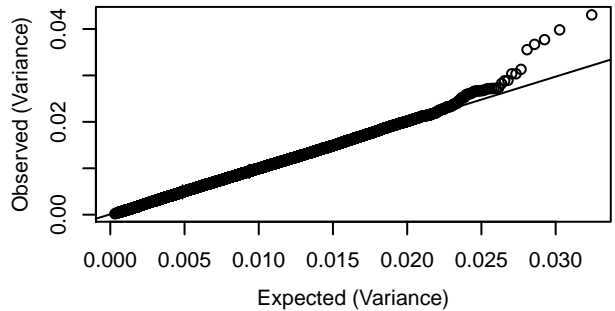

**Number of alleles: 18**

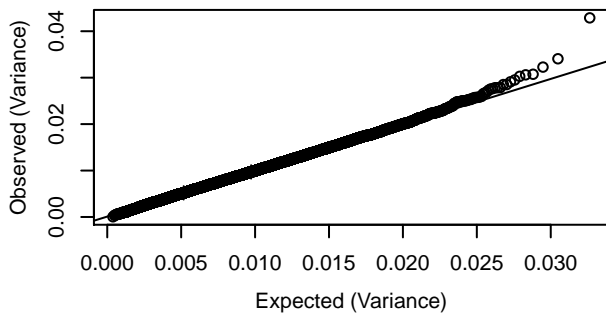

**Number of alleles: 19**

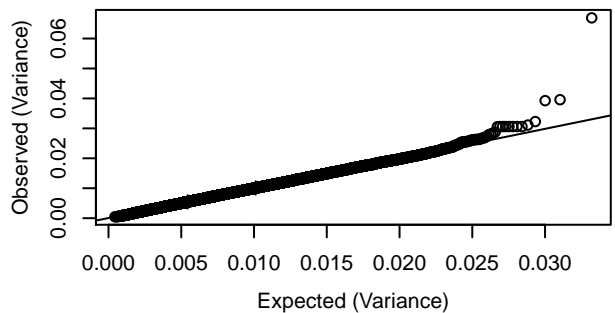

**Number of alleles: 20**

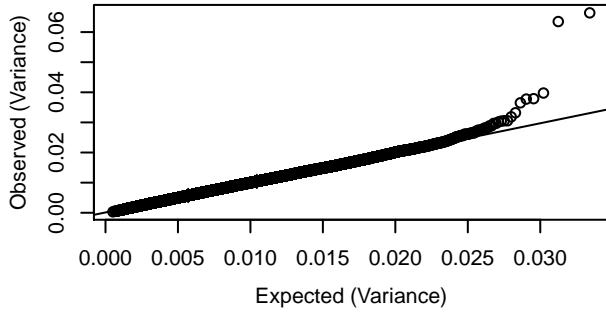

**Number of alleles: 21**

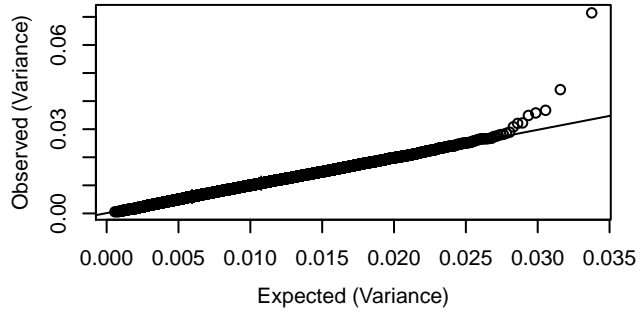

**Number of alleles: 22**

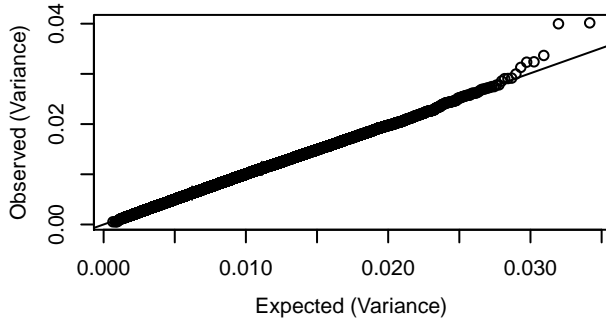

**Number of alleles: 23**

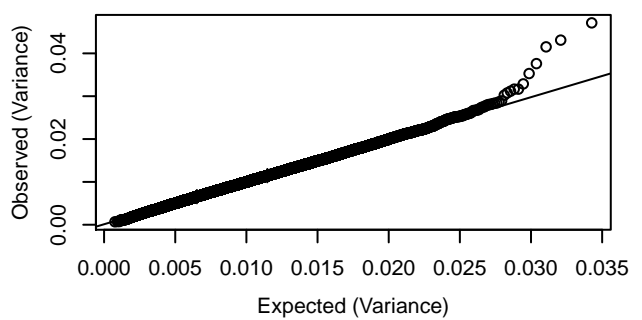

**Number of alleles: 24**

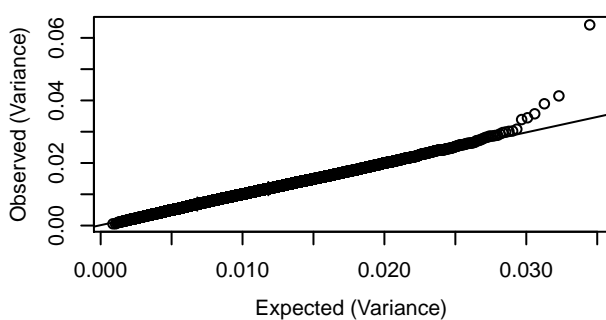

**Number of alleles: 25**

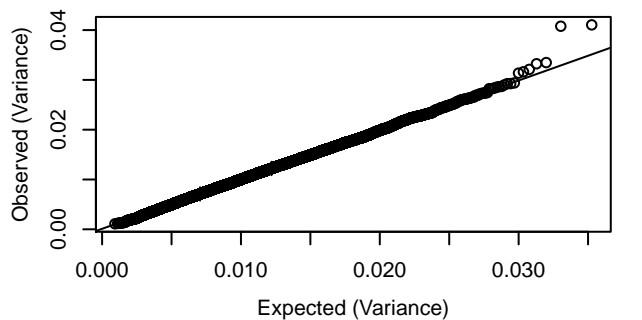

**Number of alleles: 26**

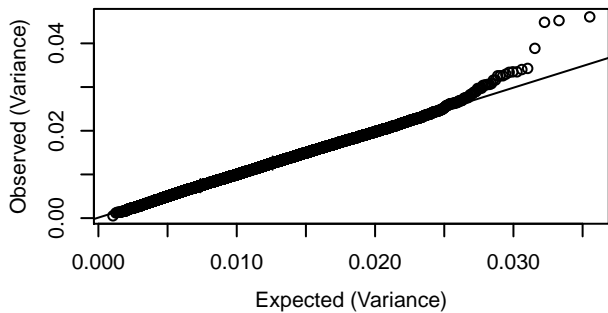

**Number of alleles: 27**

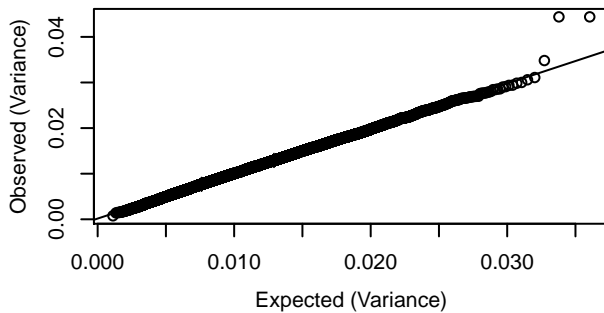

**Number of alleles: 28**

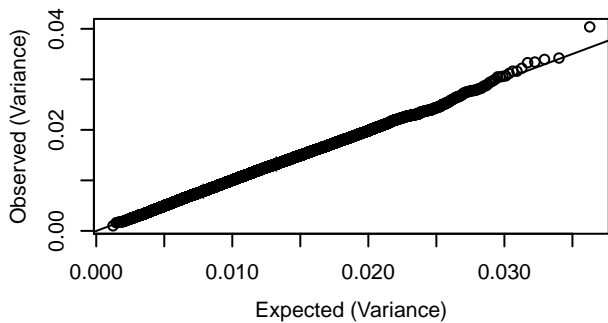

**Number of alleles: 29**

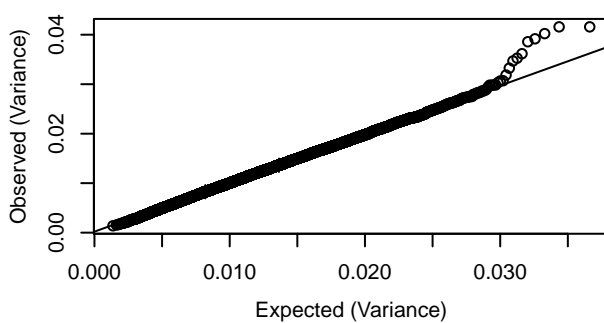

**Number of alleles: 30**

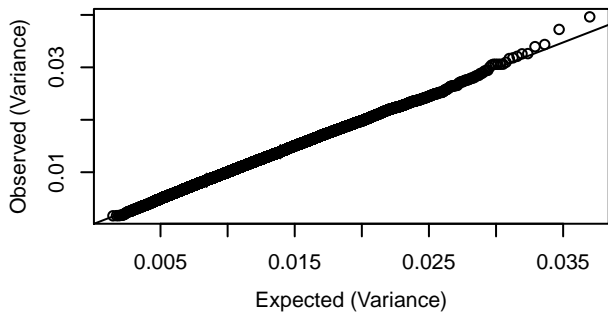

**Number of alleles: 31**

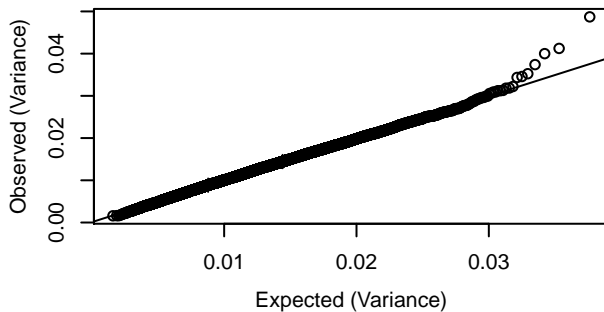

**Number of alleles: 32**

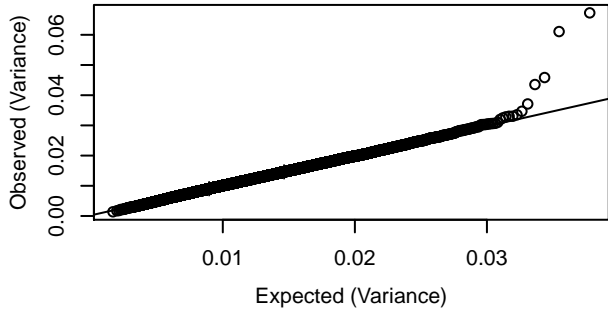

**Number of alleles: 33**

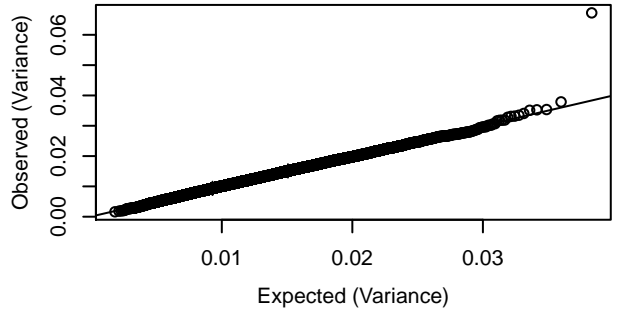

**Number of alleles: 34**

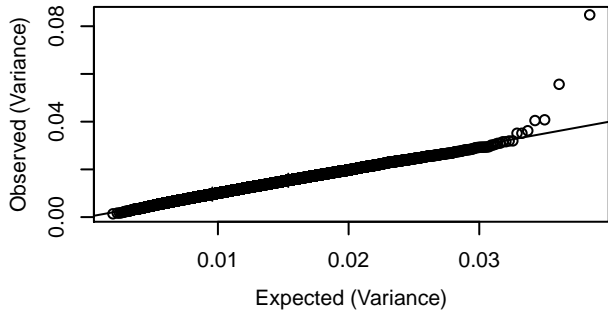

**Number of alleles: 35**

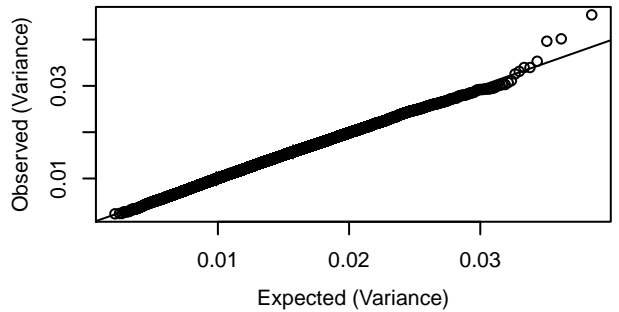

**Number of alleles: 36**

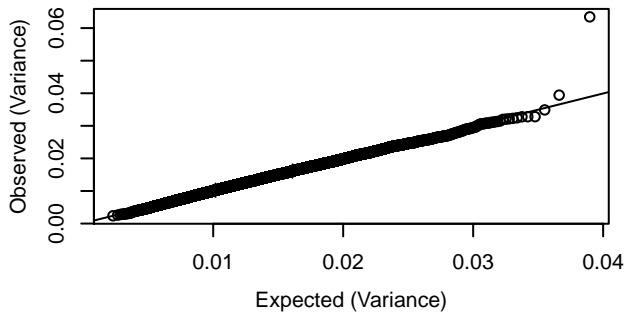

**Number of alleles: 37**

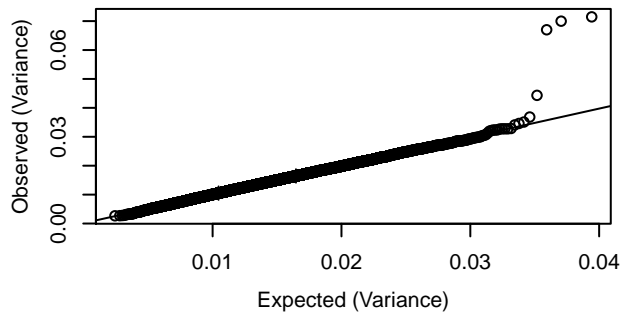

**Number of alleles: 38**

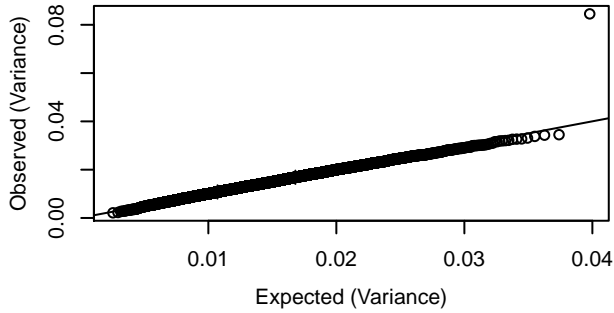

**Number of alleles: 39**

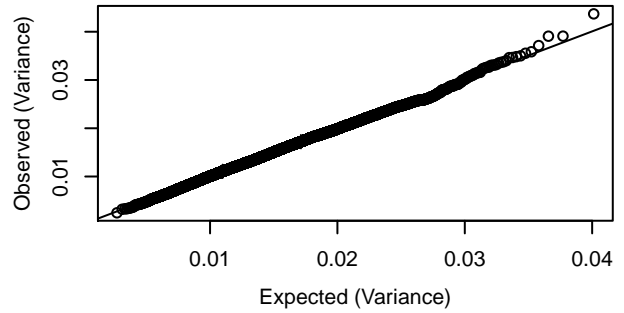

**Number of alleles: 40**

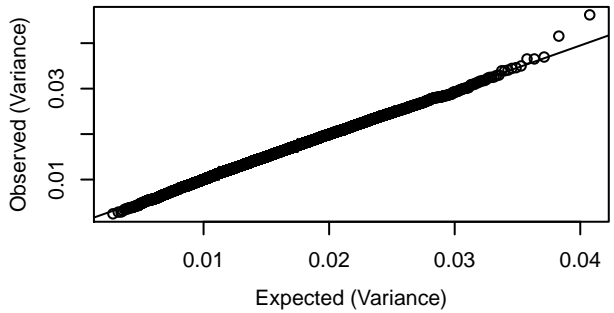

**Number of alleles: 41**

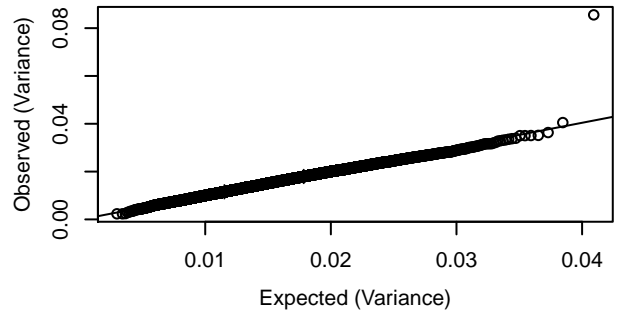

**Number of alleles: 42**

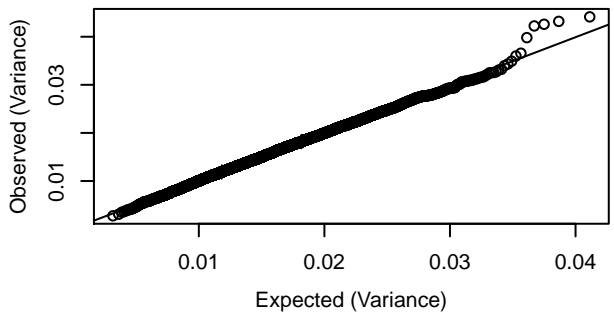

**Number of alleles: 43**

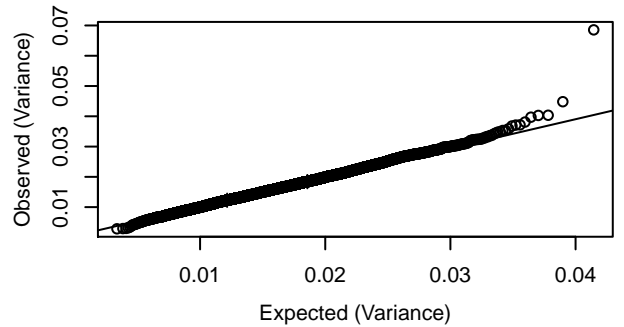

**Number of alleles: 44**

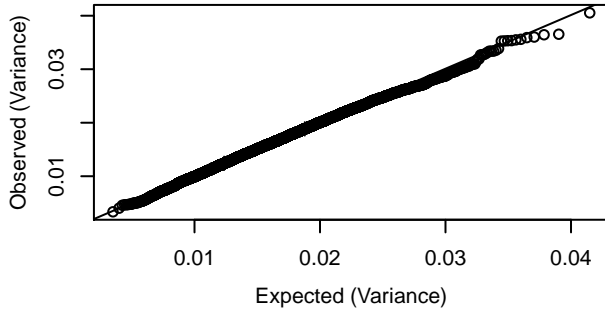

**Number of alleles: 45**

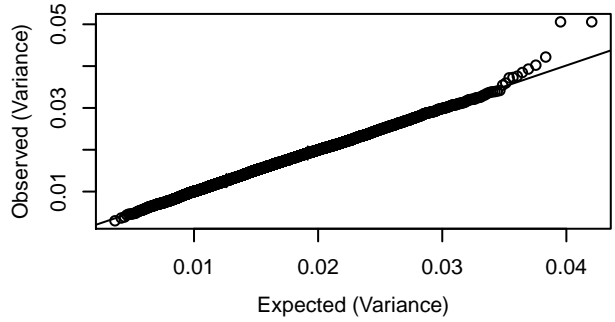

**Number of alleles: 46**

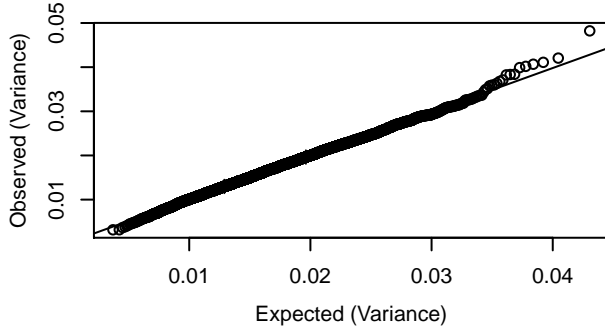

**Number of alleles: 47**

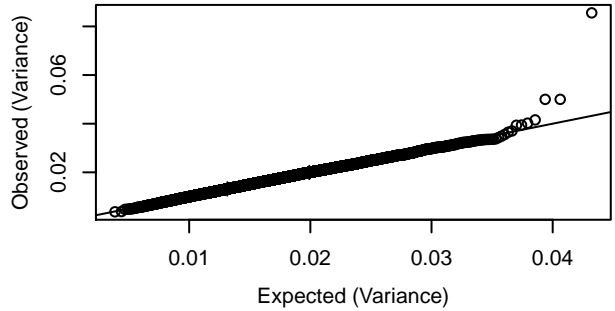

**Number of alleles: 48**

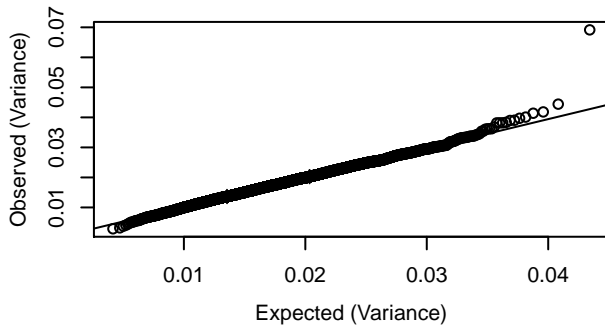

**Number of alleles: 49**

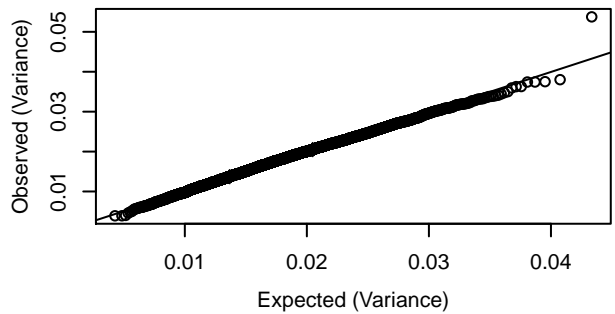



**Number of alleles: 50**

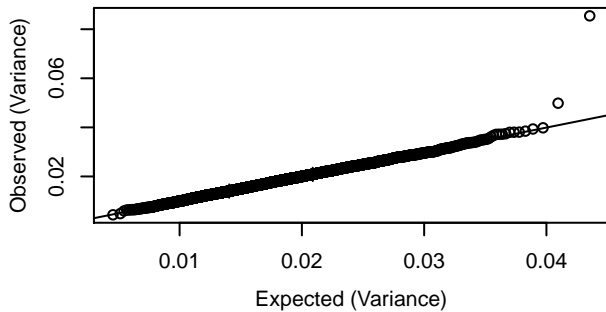

**Number of alleles: 51**

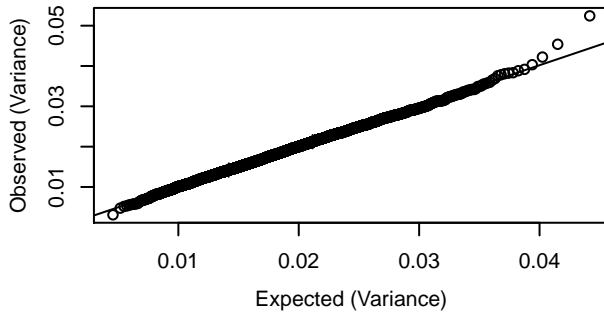

**Number of alleles: 52**

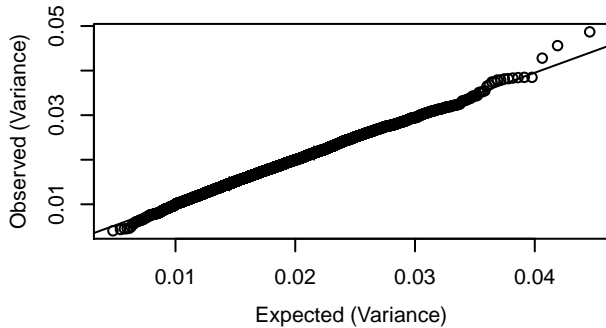

**Number of alleles: 53**

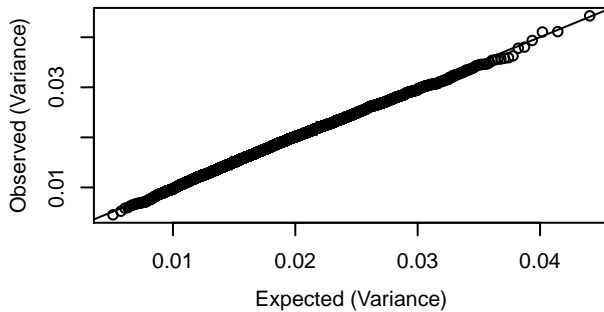

**Number of alleles: 54**

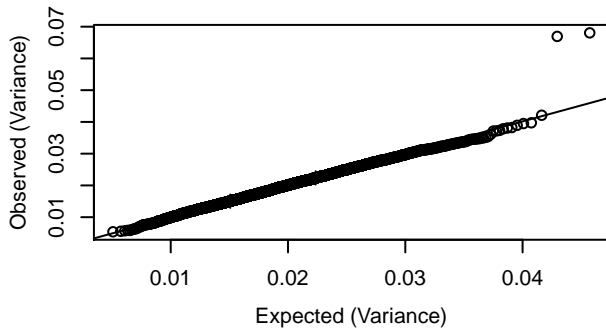

**Number of alleles: 55**

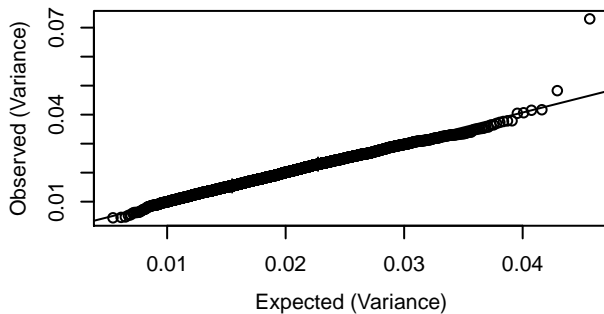

**Number of alleles: 56**

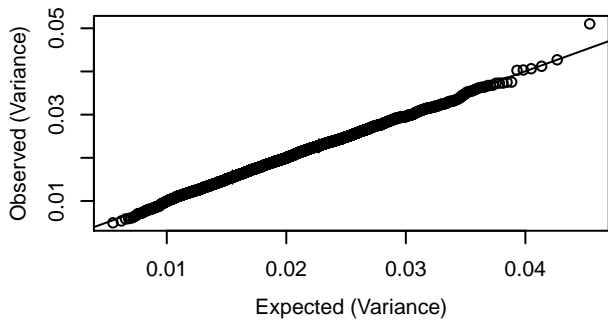

**Number of alleles: 57**

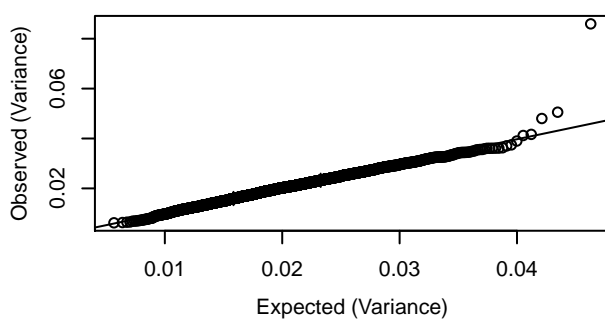

**Number of alleles: 58**

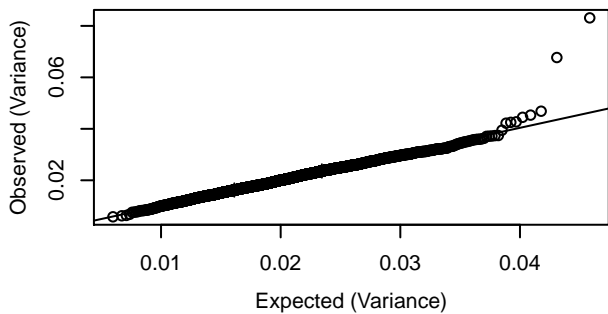

**Number of alleles: 59**

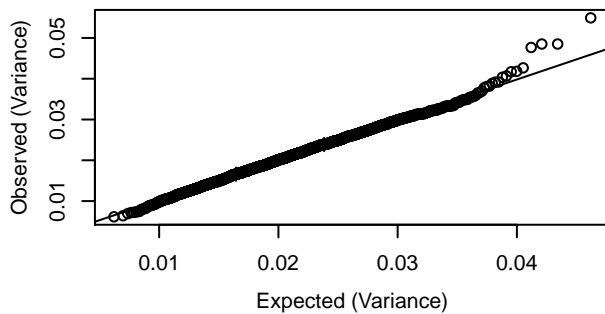

**Number of alleles: 60**

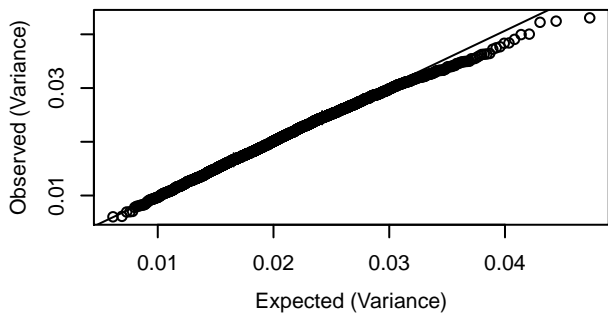

**Number of alleles: 61**

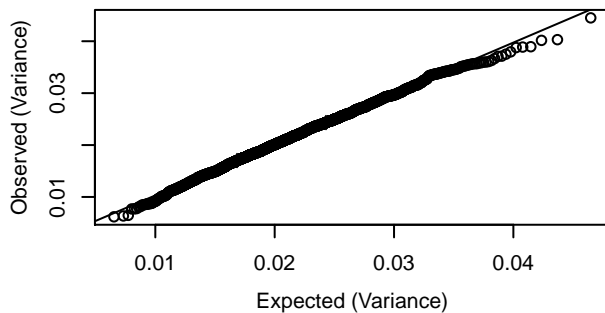

**Number of alleles: 62**

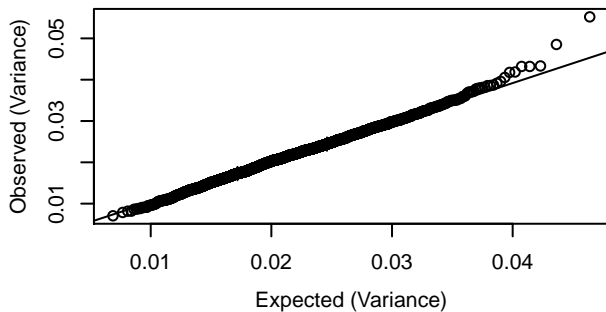

**Number of alleles: 63**

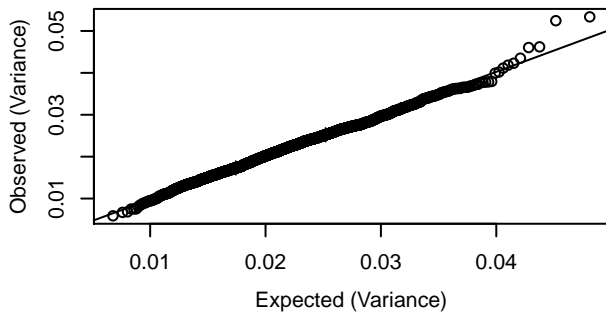

**Number of alleles: 64**

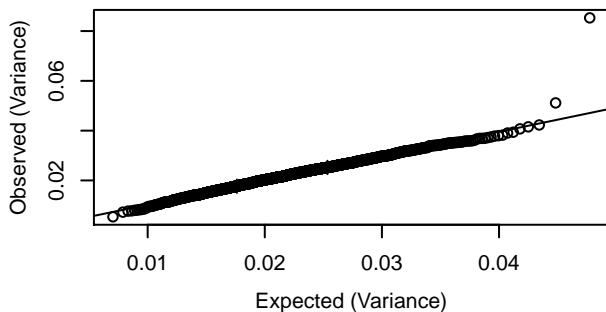

**Number of alleles: 65**

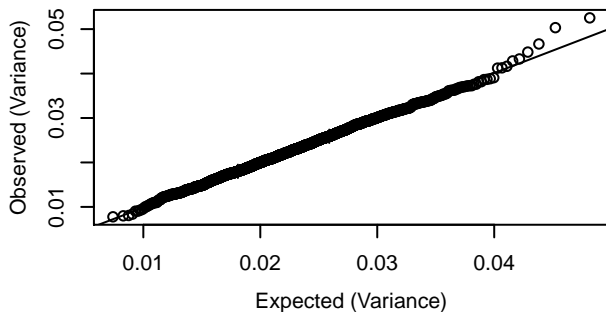

**Number of alleles: 66**

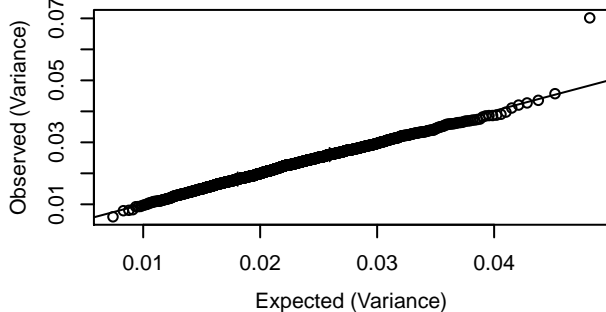

**Number of alleles: 67**

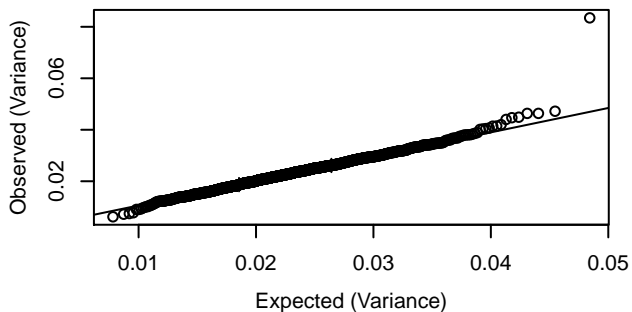

**Number of alleles: 68**

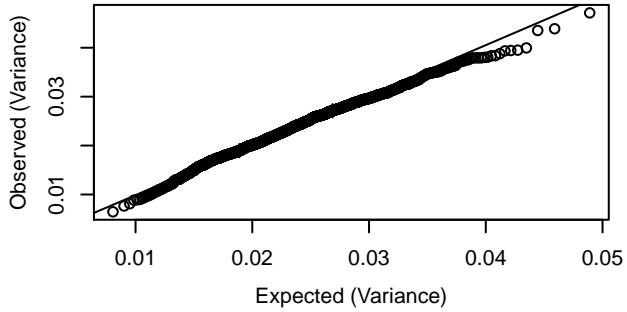

**Number of alleles: 69**

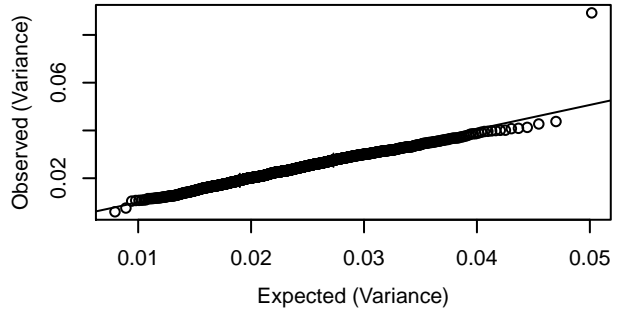

**Number of alleles: 70**

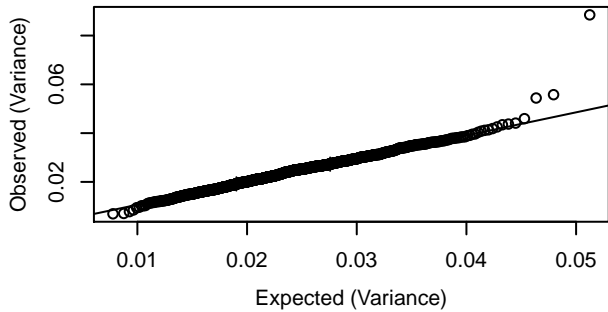

**Number of alleles: 71**

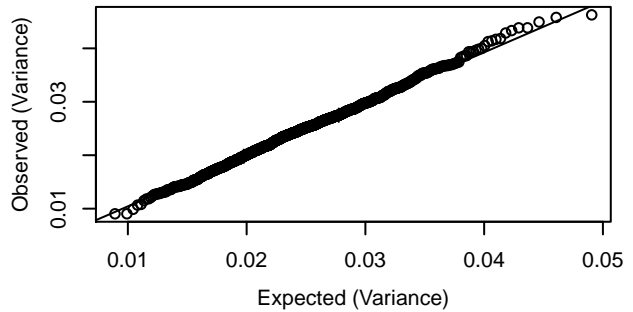

**Number of alleles: 72**

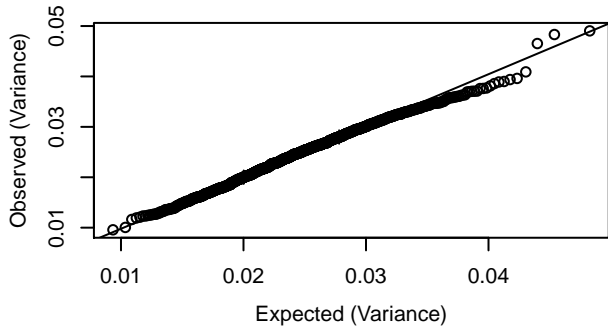

**Number of alleles: 73**

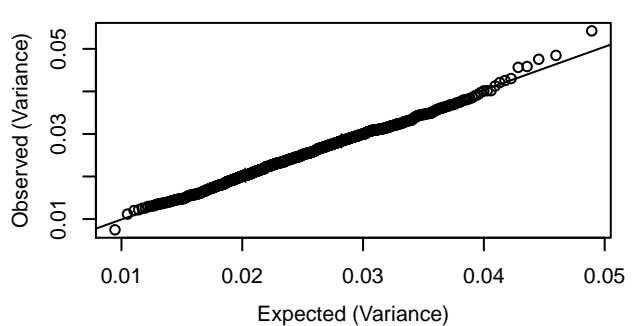

**Number of alleles: 74**

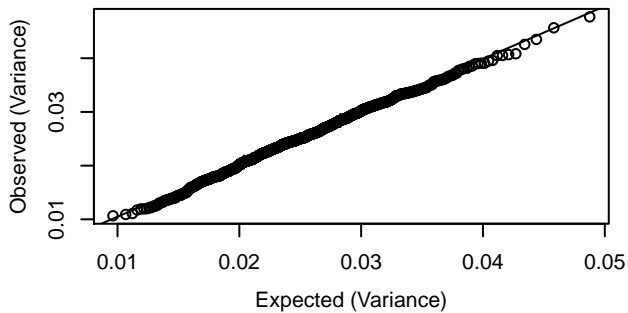

**Number of alleles: 75**

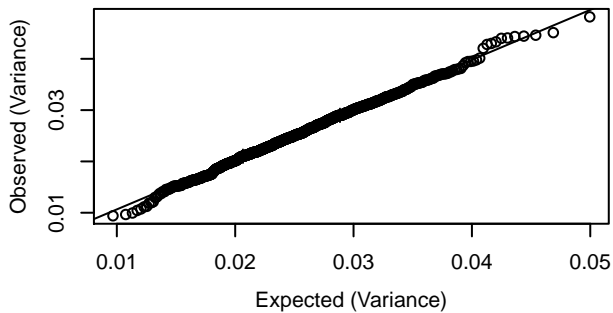

**Number of alleles: 76**

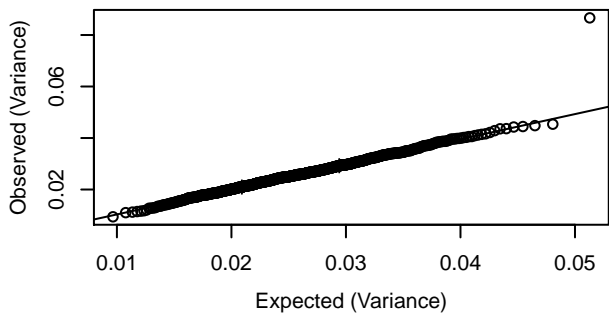

**Number of alleles: 77**

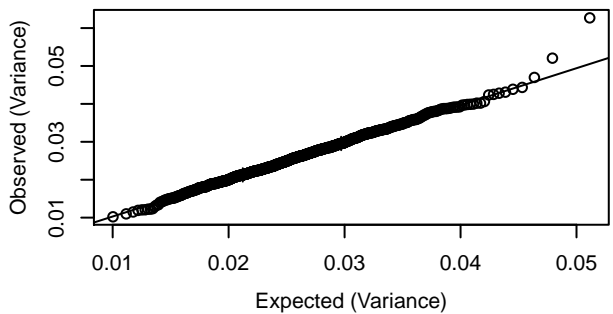

**Number of alleles: 78**

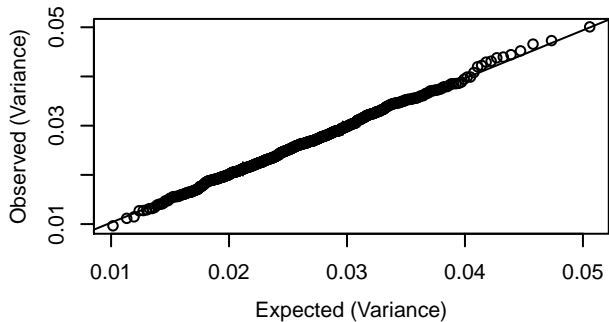

**Number of alleles: 79**

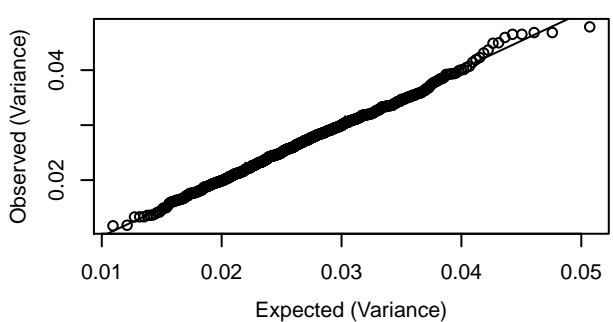

**Number of alleles: 80**

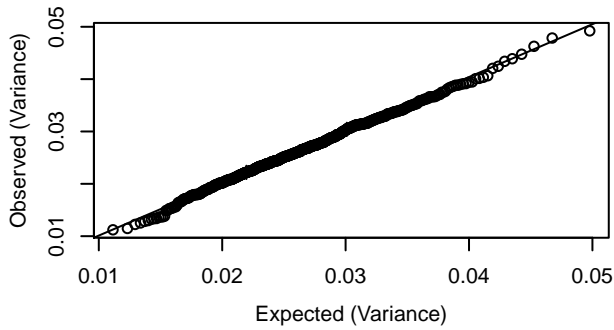

**Number of alleles: 81**

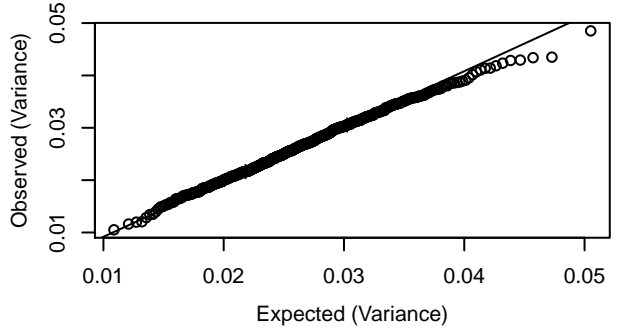

**Number of alleles: 82**

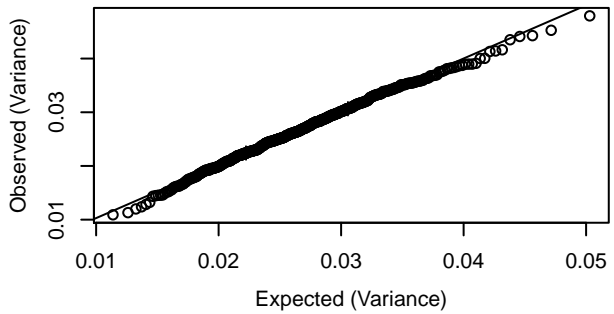

**Number of alleles: 83**

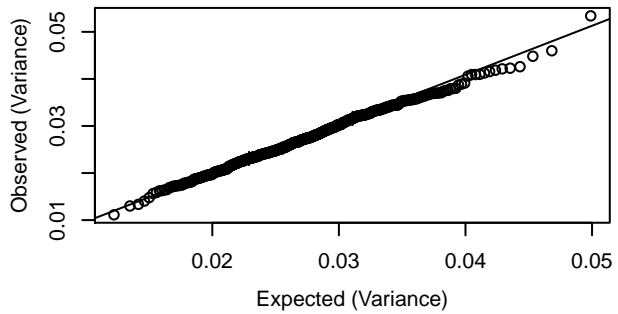

**Number of alleles: 84**

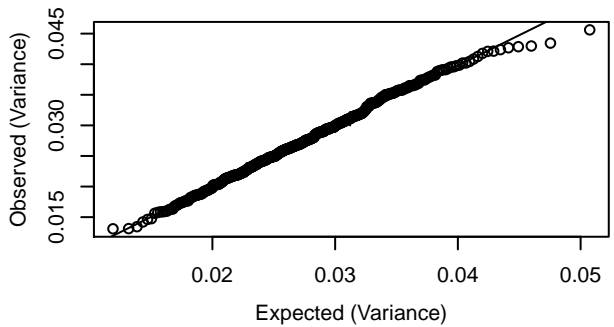

**Number of alleles: 85**

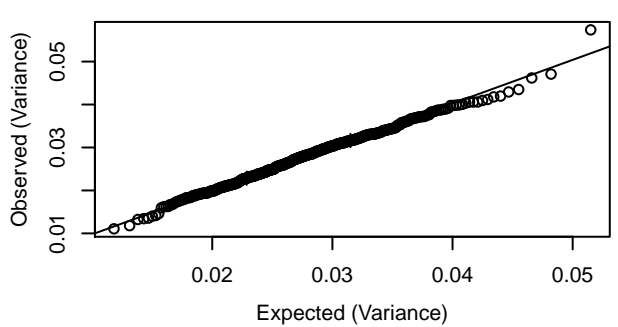

**Number of alleles: 86**

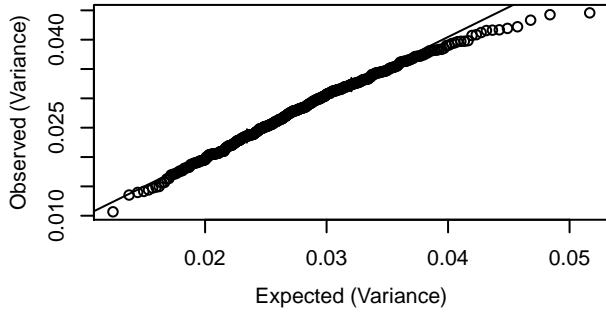

**Number of alleles: 87**

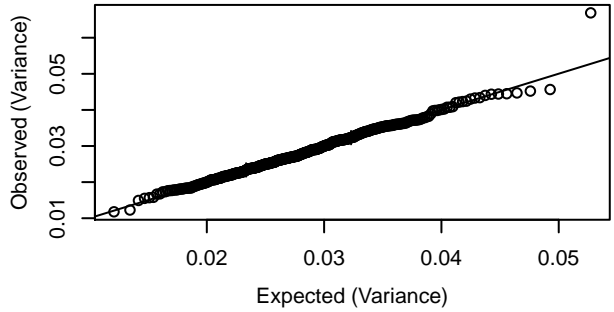

**Number of alleles: 88**

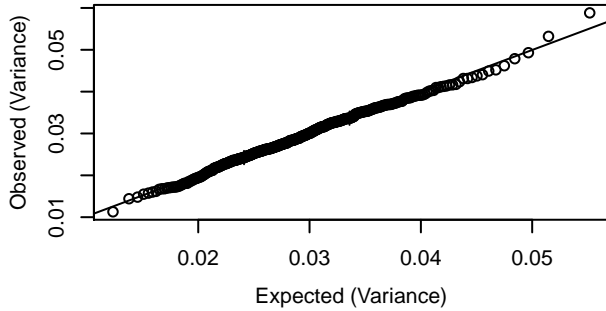

**Number of alleles: 89**

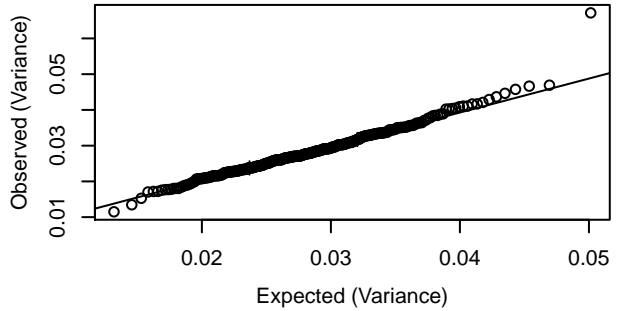

**Number of alleles: 90**

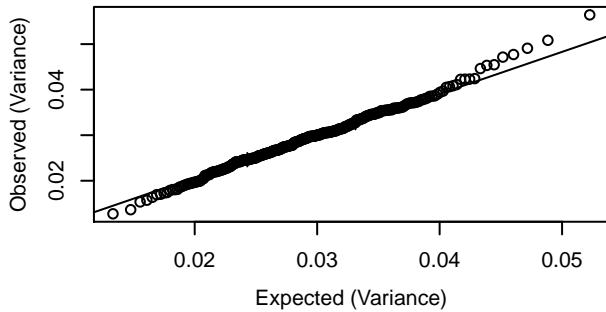

**Number of alleles: 91**

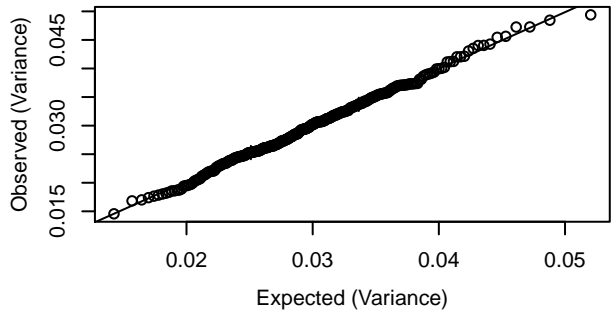

**Number of alleles: 92**

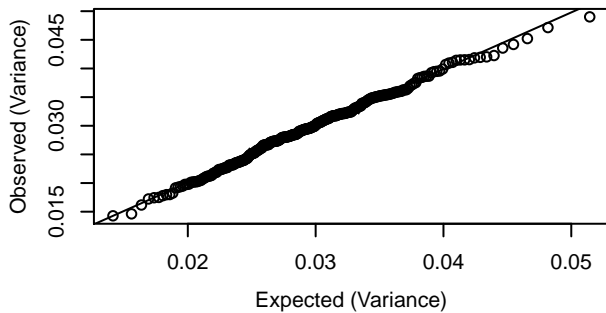

**Number of alleles: 93**

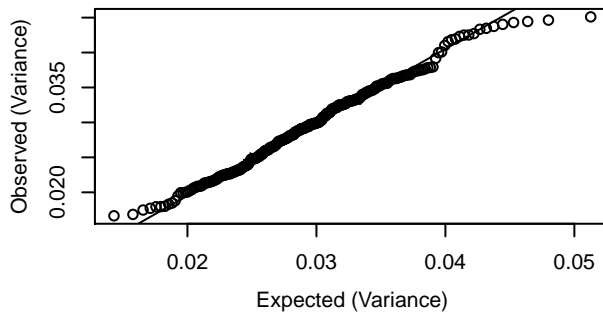

**Number of alleles: 94**

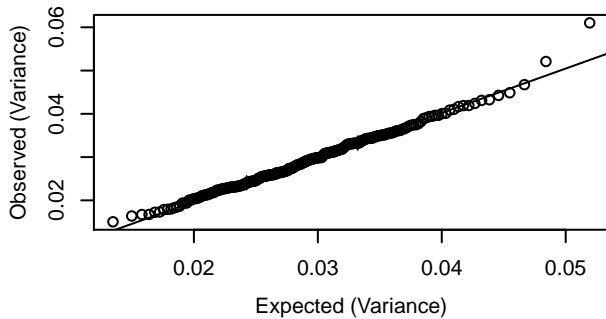

**Number of alleles: 95**

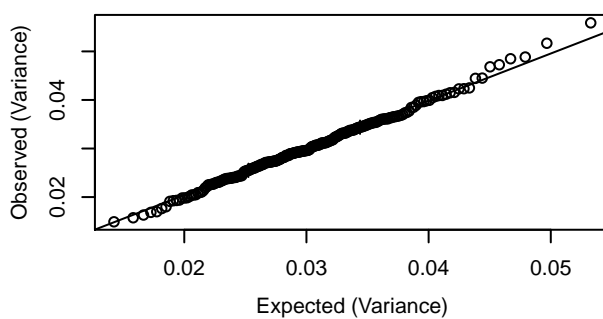

**Number of alleles: 96**

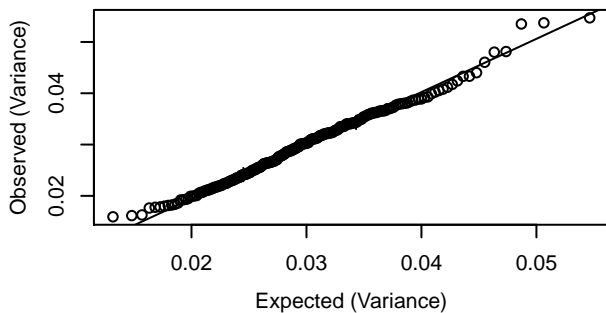

**Number of alleles: 97**

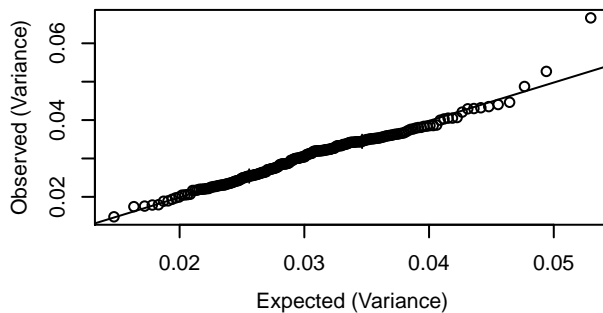



**Number of alleles: 98**

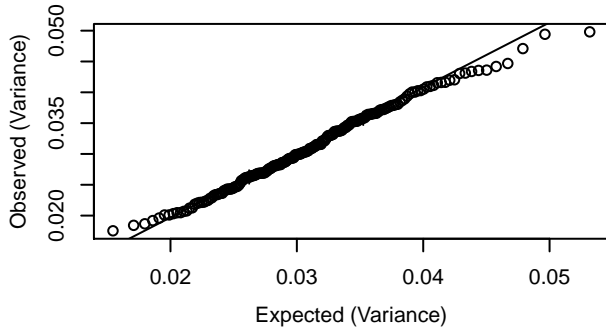

**Number of alleles: 99**

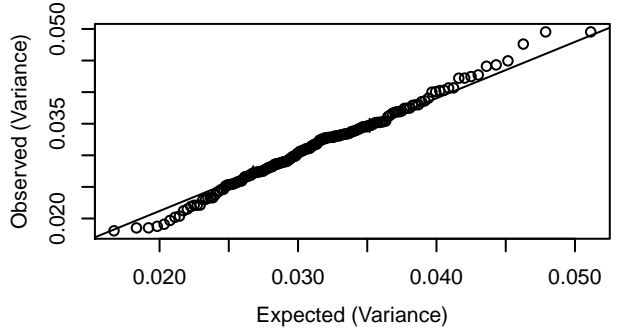

**Number of alleles: 100**

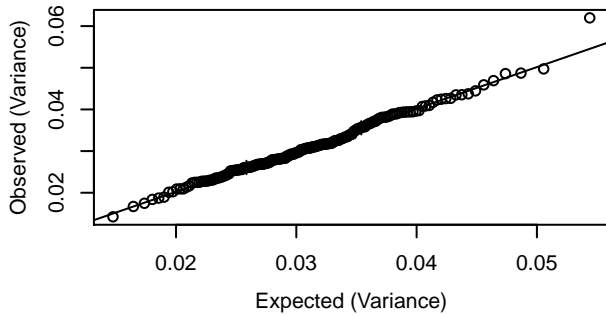

**Number of alleles: 101**

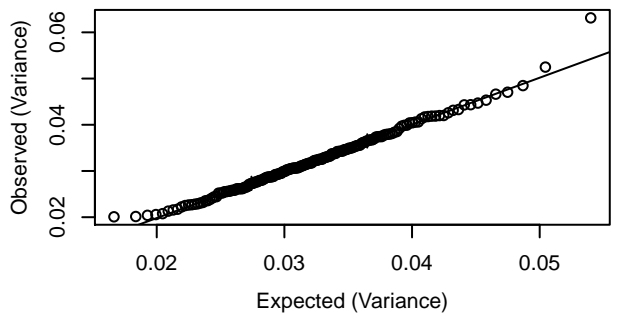

**Number of alleles: 102**

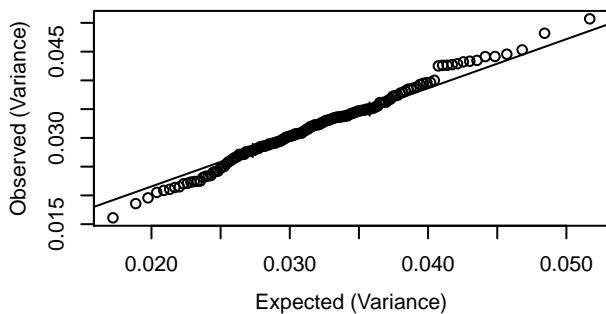

**Number of alleles: 103**

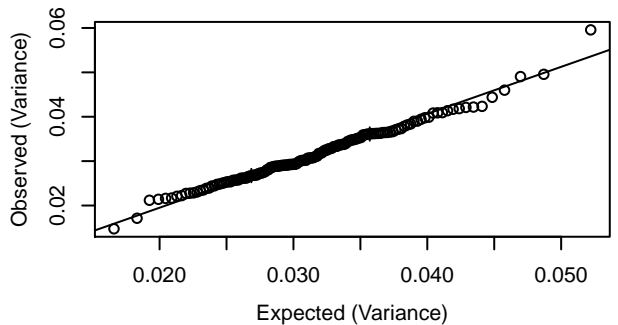

**Number of alleles: 104**

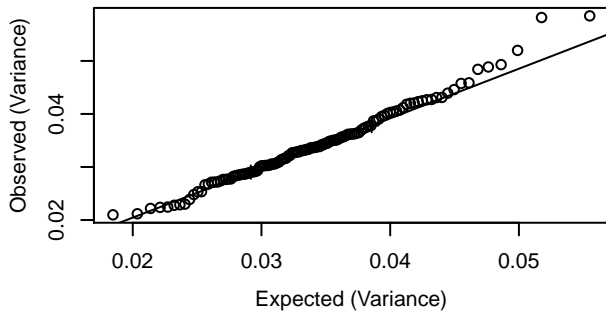

**Number of alleles: 105**

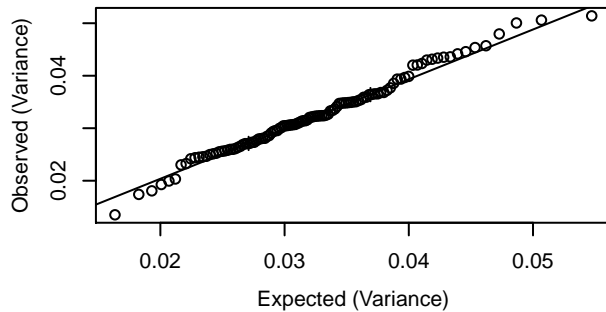

**Number of alleles: 106**

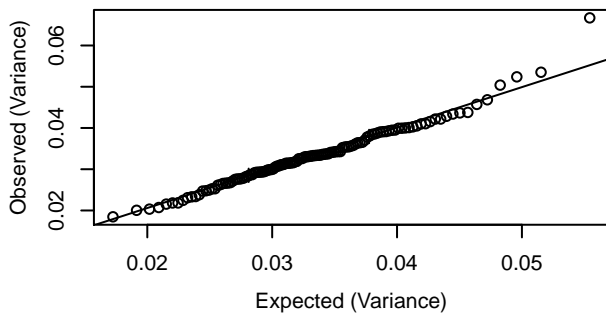

**Number of alleles: 107**

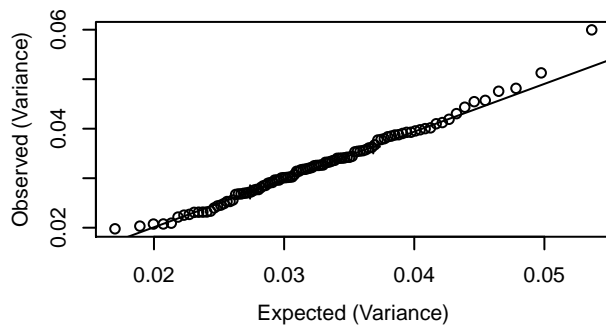

**Number of alleles: 108**

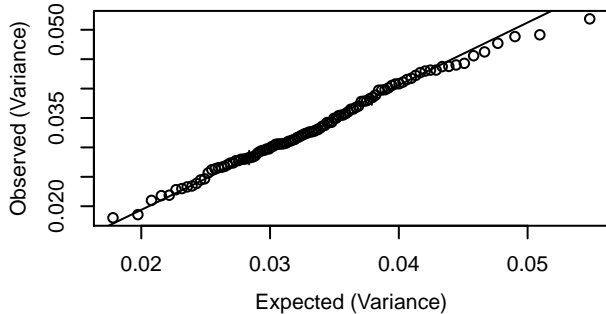

**Number of alleles: 109**

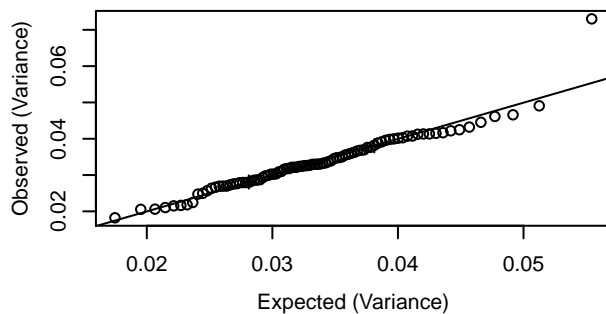

Supplement: 12863_2019_713_MOESM4_ESM.pdf [file 12863_2019_713_MOESM4_ESM.pdf]
