# Supplementary material for: Sliding window haplotype approaches overcome single SNP analysis limitations in identifying genes for meat tenderness in Nelore cattle
Source: PubMed Central journal article supplement (PMC6332854; doi:10.1186/s12863-019-0713-4), 2019-01-14

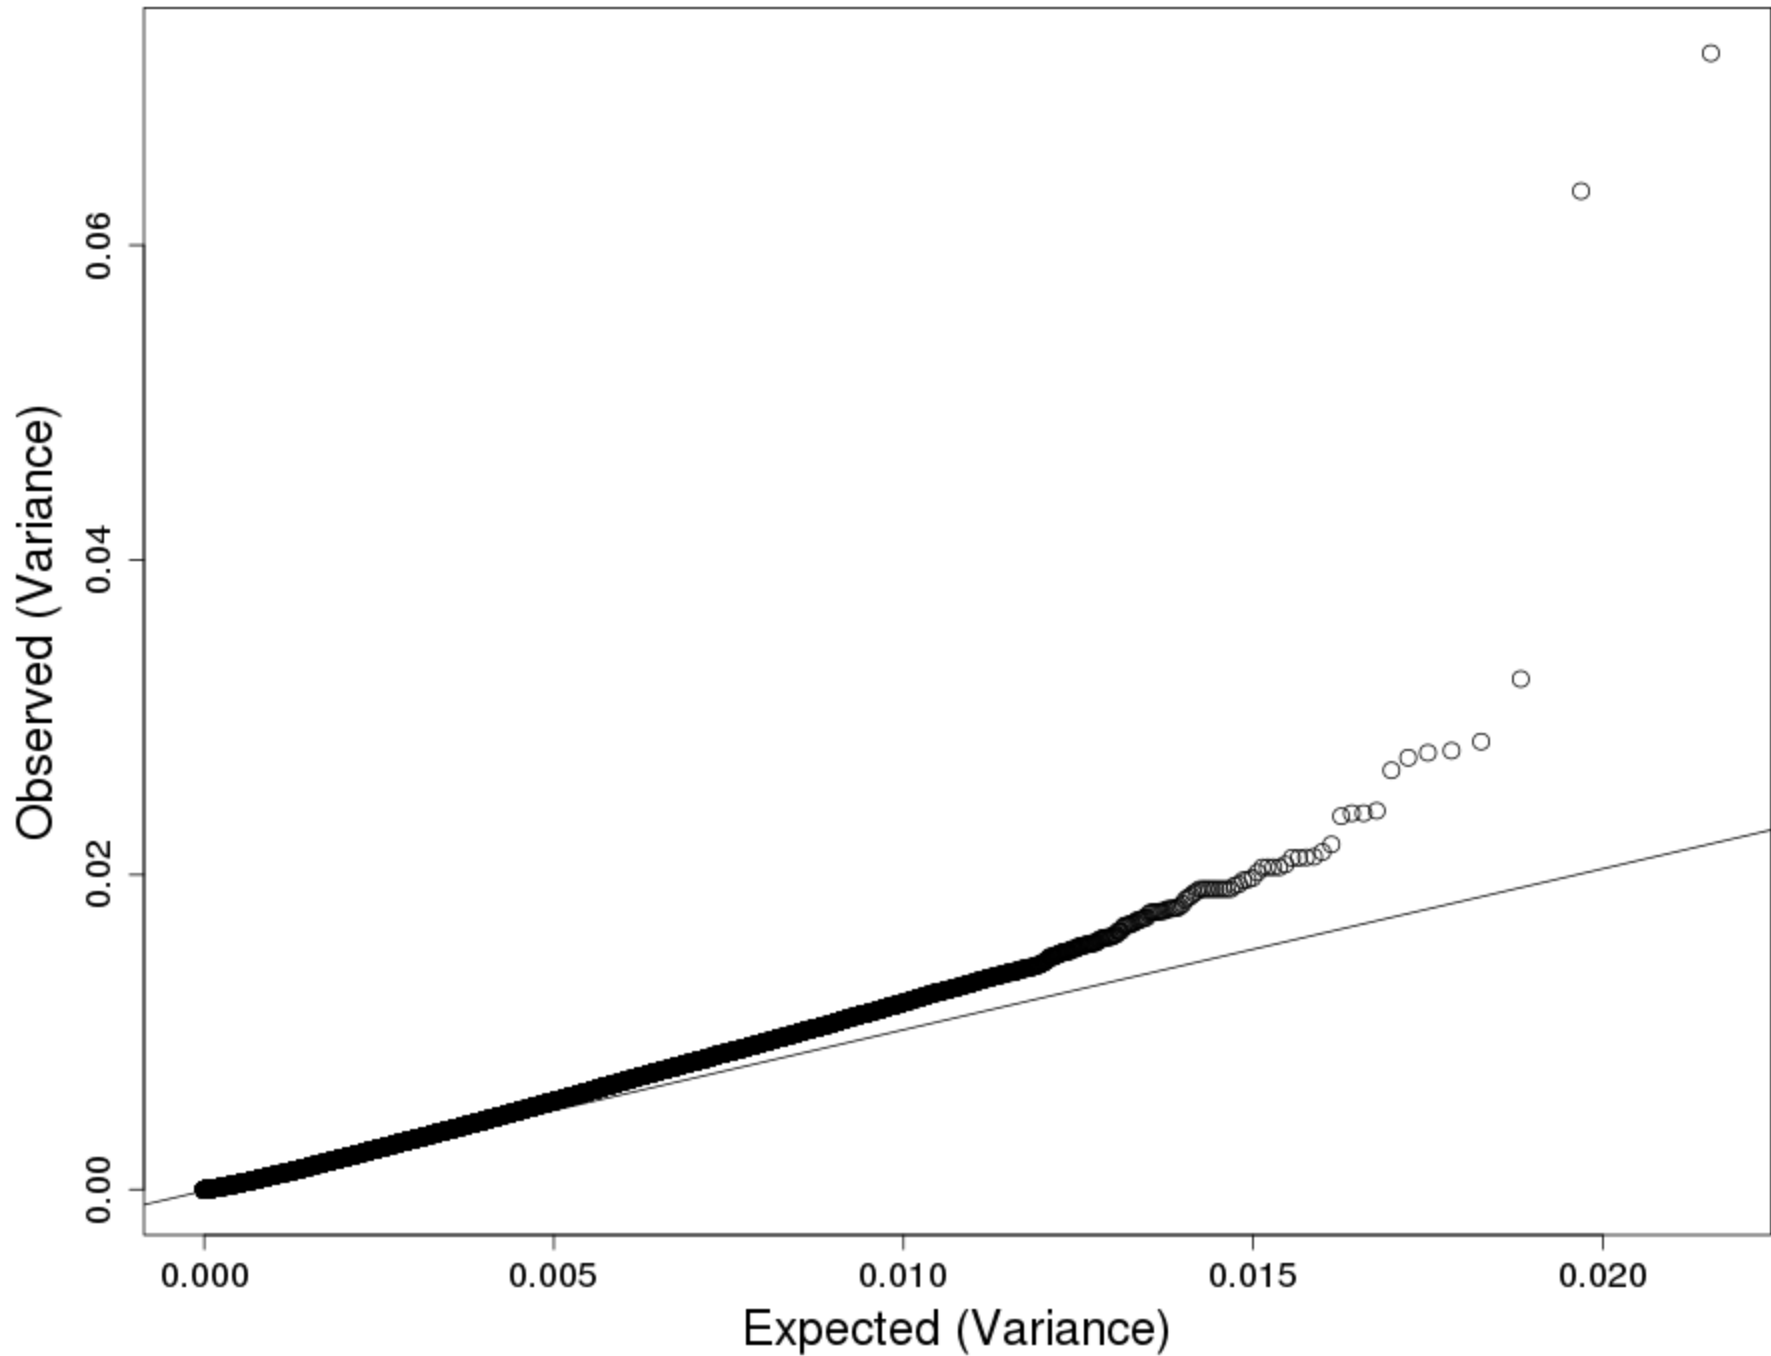

Supplement: 12863_2019_713_MOESM2_ESM.pdf [file 12863_2019_713_MOESM2_ESM.pdf]
